# Supplementary material
Source: publisher figshare collection journal article supplement (https://tandf.figshare.com/ndownloader/files/20994339)
Supplement: Supplementary file 1 [file 20994339]

**Supplementary Table 1. Comparison of morphological characters of species of *Prionospio* ‘steenstrupi’ group, adapted from literature**

| **Species** | **Shape of**  **prostomium** | **Extent of**  **caruncle** | **No. of eyes** | **Nuchal organs** | **Branchiae** | **Lateral pouches** | **Dorsal crest on chaetiger** | **References** |
| --- | --- | --- | --- | --- | --- | --- | --- | --- |
| *Prionospio andamanensis* Hylleberg & Nateewathana, 1991 | broad, subtriangular, truncate with rounded comers, slightly incised and crenulated along anterior margin | base of chaetiger 2 | 1 pair | NA | 1P>4P, 2-3A | absent | 10 to 18 | Hylleberg & Nateewathana, 1991 |
| *Prionospio anneae* Radashevsky, 2015 | Narrow and rounded anteriorly | middle of chaetiger 2 | 2 pairs | U shaped ciliary bands on each side of caruncle | 1P=4P, 2-3A | Absent | 6 to 7–20 (7 to 15-21) | Radashevsky, 2015 |
| *Prionospio anuncata* Fauchald, 1972 | anteriorly truncate keel | posterior margin of the chaetiger 1 | absent (2 pairs) | NA (V-shaped) | 1P>4P, 2-3A | NA | 85 (45-50) | Fauchald, 1972; Imajima 1990a |
| *Prionospio atrovitta sp. nov.* | subtraingular rounded anteriorly with a black band in the anterior margin | end of chaetiger 1 with a prominent black pigmentation ending just before the caruncle tip | Not visible | Not readily observable | 1P>4P, 2-3A | absent | 7 to 16 | Present study |
| *Prionospio austella* Delgado-Blas, 2015 | bottle-shaped, truncate on anterior margin, with a small medial peak | anterior edge of chaetiger 3 | 2 pairs | Absent | 1P>4P, 2-3A | absent | 6 to 11 | Delgado-Blas, 2015 |
| *Prionospio australiensis* Blake & Kudenov, 1978 | bluntly rounded anteriorly | middle of chaetiger 2 | 2 pairs | NA | 1P<4P, 2-3A | NA | 11 to 18 | Blake & Kudenov, 1978 |
| *Prionospio bocki* Söderström, 1920 | subtriangular, broadly flared on anterior margin | NA (base of chaetiger 2) | 2 pairs | NA (present) | 1P>4P, 2-3A | between 2& 3, continuing to 13-15 | 6 (9-10, continuing to 25, low crests interrupted at mid-dorsal line continuing to chaetiger 35) | Söderström, 1920; Imajima, 1990a |
| *Prionospio cooki* Radashevsky, 2015 | broadly-rounded anteriorly | end of chaetiger 4 | 2 pairs | U shaped ciliary bands on each side of caruncle | 1P=4P, 2-3A | Absent | 7 to 22 | Radashevsky, 2015 |
| *Prionospio coorilla* Wilson, 1990 | rounded anterior margin | anterior margin of chaetiger 2 | 2 pairs | Present | 1P>4P, 2-3A | absent | Absent | Wilson, 1990 |
| *Prionospio cornuta* Hylleberg & Nateewathana, 1991 | incised, broad with anterior margin projecting as 2 rounded horns | base of chaetiger 2 | 2 pairs | NA | 1P<4P, 2-3A | NA | 10 to 37 | Hylleberg & Nateewathana, 1991 |
| *Prionospio cristata*  Foster, 1971 | subtriangular, rounded on anterior margin | base of chaetiger 1 or 2 | 2 pairs | horseshoe-shaped nuchal organs with anterior-most ends fused over caruncle | 1P=4P, 2-3A | Absent | on 7 and 9 forming a low ridge on 8, 10 and subsequent chaetigers | Foster, 1971; Maciolek 1985; Delgado-Blas, 2015 |
| *Prionospio cristaventralis* Delgado-Blas *et al*., 2018 | bottle-shaped, broadly rounded, flared anteriorly | posterior edge of chaetiger 2 | 2 pairs | U-shaped | 1P>4P, 2-3A | absent | DC on 10 & 11 to 34 & VC from 11 to 19 | Delgado-Blas *et al*., 2018 |
| *Prionospio depauperata* Imajima, 1990 | truncate on anterior margin sometimes with a small peak | base of chaetiger 2 | 2 pairs | NA | 1P=4P, 2-3A | Absent | 7-13 (7-16) | Imajima, 1990a; Dagli & Çinar, 2009 |
| *Prionospio dubia*  Day, 1961 | depressed and rounded in front | just reaches chaetiger 2 | 2 pairs | absent or present | 1P>4P, 2-3A | absent | absent | Day, 1961; Maciolek, 1985; Imajima, 1990a; Wilson, 1990; Blake *et al*., 1996; Dagli & Çinar 2009 |
| *Prionospio fallax* Söderström, 1920 | anteriorly truncated (bottle shaped) | anterior margin of chaetiger 2 | 2 pairs | NA | 1P≤4P, 2-3A | absent | 7 | Söderström, 1920; Sigvaldadóttir & Mackie, 1993; Dagli & Çinar, 2009; Delgado-Blas et al., 2018 |
| *Prionospio henriki* Hylleberg & Nateewathana, 1991 | subtriangular, truncate with 2 small notches on anterior margin | end of chaetiger 2 | 2 pairs | NA | 1P>4P, 2-3A | absent | Dorsal membraneous folds present on chaetiger 10 to 15 while ventrolateral folds from 10 to 14 | Hylleberg & Nateewathana, 1991 |
| *Prionospio jonatani* Delgado-Blas, 2015 | anteriorly narrow, widening and becoming rounded in midregion | anterior edge of chaetiger 2 | absent | V-shaped | 1P>4P, 2-3A | absent | absent | Delgado-Blas, 2015 |
| *Prionospio jubata*  Blake, 1996 | subtriangular, truncate anteriorly with entire margin and small terminal peak | to chaetiger 3 | 2 pairs | NA | 1P<4P, 2-3A | NA | 6 | Blake *et al*., 1996 |
| *Prionospio komaeti* Hylleberg & Nateewathana, 1991 | subtriangular, truncate | base of chaetiger 2 | 2 pairs | NA | 1P<4P, 2-3A | absent | 7 to 11 | Hylleberg & Nateewathana, 1991 |
| *Prionospio kulin*  Wilson, 1990 | anterior margin rounded | posterior margin of chaetiger 2 | 2 pairs | NA (U-shaped) | 1P=4P, 2-3A | absent (present from 9-13) | 7-20 (7 to 15-24) | Wilson, 1990; Radhashevsky, 2015 |
| *Prionospio lineata* Imajima, 1990 | rounded, broadly flared on anterior margin or subtriangular, truncate | base of chaetiger 2 | 2 pairs | NA | 1P=4P, 2-3A | absent | 11 to 18 | Imajima, 1990a; Dagli & Çinar, 2009 |
| *Prionospio lylei* Radashevsky, 2015 | round anteriorly | end of chaetiger 1 | 2 pairs | U-shaped ciliary bands | 1P=4P, 2-3A | Absent | 8 (7-8) | Radashevsky, 2015 |
| *Prionospio malayensis* (Caullery, 1914) | NA (subtriangular, anterior margin broad, truncate) | anterior of chaetiger 2 (base of chaetiger 2) | 1 pair (2 pair) | NA | 1P>4P, 2-3A (1P≥4P) | absent | 10 to 16 | Caullery, 1914; Gallardo, 1968; Hylleberg & Nateewathana, 1991 |
| *Prionospio marsupiala* Blake, 1996 | triangular | end of chaetiger 2 | absent | NA | 1P<4P, 2-3A | NA | 6 to 25 | Blake *et al*., 1996 |
| *Prionospio membranacea* Imajima, 1990 | truncate on anterior margin | end of chaetiger 1 | 2 pairs | NA | 1P≥4P, 2-3A | absent | 7 | Imajima, 1990a |
| *Prionospio multicristata* Hutchings & Rainer, 1979 | broadly-rounded anteriorly, | extends back to level of chaetiger 1 (end of chaetiger 3) | 2 pairs | present | 1P=4P, 2-3A | NA (absent) | 7 to 30 | Hutchings & Rainer, 1979;Wilson 1990; Radashevsky, 2015 |
| *Prionospio neenae* Hylleberg & Nateewathana, 1991 | subtriangular, incised at anterior margin | base of chaetiger 2 | 2 pairs | NA | 1P<4P, 2-3A | absent | 11 to16 | Hylleberg & Nateewathana, 1991 |
| *Prionospio nielseni* Hylleberg & Nateewathana, 1991 | broad, anterior margin slightly concave | base of chaetiger 2 | 1 pair | NA | 1P<4P, 2-3A | absent | 10 to 33 | Hylleberg & Nateewathana, 1991 |
| *Prionospio nirripa*  Wilson, 1990 | broad anteriorly with shallow indentation in anterior margin | posterior margin of chaetiger 2, attached to dorsum throughout | 2 pairs | NA | 1P<4P, 2-3A | NA | 10 to 30 | Wilson, 1990 |
| *Prionospio oligopinnulata* Delgado-Blas, 2015 | square-shaped, truncate anteriorly | anterior edge of chaetiger 2 with middle slit along caruncle | 2 pairs | present | 1P>4P, 2-3A | absent | 7 t0 8 to 9 to 14 | Delgado-Blas, 2015 |
| *Prionospio orensanzi* Blake, 1983 | broadly rounded on anterior margin with weak medial incision | to middle of chaetiger 2 | 2 pairs | present | 1P=4P, 2-3A | NA | 6 to 19 | Blake, 1983 |
| *Prionospio oshimensis* Imajima, 1990 | subtraingular, anteriorly rounded, brown pigmentation patch dorsally and ventrally | end of chaetiger 1 with dark pigmentation on caruncle and basal part of caruncle covered by an elliptical opaque membrane | absent | NA | 1P>4P, 2-3A | absent | absent | Imajima, 1990b |
| *Prionospio pacifica*  Zhou & Li, 2009 | truncate anteriorly, slightly inflated at the level of eyes | posterior margin of chaetiger 2 | 2 pairs | NA | 1P>4P, 2-3A | absent | DC from 10 to 25 and VC on 9 | Zhou & Li, 2009 |
| *Prionospio paradisea* Imajima 1990 | broadly rounded anteriorly, flared on anterior margin | base of chaetiger 2 | 2 pairs | present | 1P>4P, 2-3A | NA | 10 to 60 | Imajima 1990a |
| *Prionospio parapari* Delgado-Blas *et al*., 2018 | bottle-shaped and truncated | anterior edge of chaetiger 2 | 2 pairs | V shaped | 1P>4P, 2-3A | NA | 7 to 9 | Delgado-Blas *et al*., 2018 |
| *Prionospio phuketensis* Hylleberg & Nateewathana, 1991 | subtriangular, rounded truncate | posterior end of chaetiger 1 | 1 pair | NA | 1P<4P, 2-3A | absent | 7 and 10 only | Hylleberg & Nateewathana, 1991 |
| *Prionospio queenslandica* Blake & Kudenov, 1978 | broad with 4 small peaks on anterior margin | posterior border of chaetiger 2 | 2 pairs | NA | 1P=4P, 2-3A | NA | 5 to 14 | Blake & Kudenov, 1978 |
| *Prionospio rotalis* Mohammad, 1970 | flat, broad and notched in front | anterior margin of chaetiger 3 | 4 eyes | NA | 1P<4P, 2-3A | NA | 6 to 26 | Mohammad, 1970 |
| *Prionospio rotunda* Delgado-Blas, 2015 | pyriform-shaped, rounded anteriorly | posterior edge of chaetiger 2 | 2 pairs | present | 1P>4P, 2-3A | absent | on 8 only | Delgado-Blas, 2015 |
| *Prionospio rugosa* Sigvaldadóttir, 1997 | T shaped | posterior margin of chaetiger 2 | 2 pairs | present | 1P=4P, 2-3A | NA | DC from 10 to 16 or 17 and VC on 9 | Sigvaldadóttir, 1997 |
| *Prionospio runei* Hylleberg & Nateewathana, 1991 | smoothly rounded | end of chaetiger 2 | 1 pair | NA | 1P<4P, 2-3A | absent | 7 to 9 | Hylleberg & Nateewathana, 1991 |
| *Prionospio sishaensis*  Wu & Chen, 1964 | depressed and rounded anteriorly | narrows posteriorly forming raised keel which just reaches chaetiger 2 | 1 pair | NA | 1P=4P, 2-3A | NA | 10 | Wu & Chen, 1964 |
| *Prionospio steenstrupi* Malmgren, 1867 | bottle shaped anterior part squarish with straight frontal margin | posterior margin of chaetiger 2 (2 or 3) | 2 pairs | NA | 1P=4P, 2-3A | absent | 7 (9-13) | Malmgren, 1867; Maciolek, 1985; Sigvaldadóttir & Mackie, 1993; Blake *et al*., 1996; Dagli & Çinar, 2009 |
| *Prionospio variegata* Imajima, 1990 | anteriorly rounded, with 3 small peaks along margin | base of chaetiger 1 | 2 pairs | NA | 1P>4P, 2-3A | absent | 7 to 14 | Imajima, 1990a |

**Supplementary Table 2.Comparison of the morphological characters of species of *Prionospio* ‘steenstrupi’ group, adapted from the literature**

| **Species** | **Sabre setae** | | **Hooded hooks** | | | | | **Pygidium** | **Reference** |
| --- | --- | --- | --- | --- | --- | --- | --- | --- | --- |
| **start on chaetiger** | **maximum no.** | **Neuropodial hooks start on chaetiger** | **maximum no.** | **no. of teeth** | **Notopodial hooks start on chaetiger** | **maximum no.** |
| *Prionospio andamanensis*  Hylleberg & Nateewathana, 1991 | 10 | NA | 16-18, neuropodial post seatal lobes with crenulateedges on chaetiger 7 to 11 | 10 to 12 starting from 1-3 hooks | NA | 36-39 | 1 to 4 | NA | Hylleberg & Nateewathana, 1991 |
| *Prionospio anneae* Radashevsky, 2015 | Absent | Absent | 8 (8 to 9) | 8 | 4–6 pairs of thin, long upper teeth arranged in two vertical rows above main fang, with inner and outer hoods | 28-39 | 5 | 1 long MDC, 1 pair of short VC | Radashevsky, 2015 |
| *Prionospio anuncata* Fauchald, 1972 | 22 (20-21) | NA (1-2) | 30 (27-32) | NA (8-9) | 5 pairs of small teeth above main fang; hoods are short and distally rounded | 91 (66-75) | NA (5) | NA (1 slender DMC and 2 short VLL) | Fauchald, 1972; Imajima 1990a |
| *Prionospio atrovitta sp. nov.* | 15 (16) | 1 | 18 (17) | 1-6 (1-7) | 4 small teeth above main fang | 51 to last chaetiger | 3 | 1 long MDC and 2 short LL | Present study |
| *Prionospio austella* Delgado-Blas, 2015 | 10 | upto 2 | 16 | upto 10 | 4 pairs of teeth above long main tooth | 46 | upto 4 | NA | Delgado-Blas, 2015 |
| *Prionospio australiensis* Blake & Kudenov, 1978 | 11 | NA | 17 | 8 | 8-12 apical teeth arranged in 2 rows above main fang | 45 | NA | 1 long MDC, 2 rounded LL | Blake & Kudenov, 1978 |
| *Prionospio bocki* Söderström, 1920 | NA (10) | NA (1-2) | 16-17 (14-16) | NA (11) | NA (6-7 pairs of small teeth above main fang ,secondary hood small) | NA (44-46) | NA (5) | NA | Söderström, 1920; Imajima,1990a |
| *Prionospio cooki* Radashevsky, 2015 | 10 | 1 | 12 to 14 | 8 (3-8) | 4–6 pairs of small upper teeth arranged in 2 vertical rows above main fang | 30 | 5 | 1 MDC, 1 pair of short VC | Radashevsky, 2015 |
| *Prionospio coorilla* Wilson, 1990 | 13(12-14) | 1 to 2 | 18(15-18) | 5 to 6 | 3-4 pairs of small teeth in 2 rows above the main fang | 50 (42) | 1 to 2 | 1 short threadlike AC, LL absent | Wilson, 1990 |
| *Prionospio cornuta* Hylleberg & Nateewathana, 1991 | 11 to 12 | NA | 16-19 | 1 to 5 | NA | 36-43 | 6 to 8 | 1 MDC and 2 LL | Hylleberg & Nateewathana, 1991 |
| *Prionospio cristata* Foster, 1971 | 10 | NA(2) | 10 to 13 | NA(7) | 4 pairs of small teeth above main tooth, secondary hood present | 21-37 (26-34) | NA (5) | 1 long MDC and 2 short LL | Foster, 1971; Maciolek 1985; Delgado-Blas, 2015 |
| *Prionospio cristaventralis*  Delgado-Blas *et al*., 2018 | 10 | 1 | 15 | upto 10 | 6 pairs of small teeth above main fang, secondary hood small | NA | NA | NA | Delgado-Blas *et al*., 2018 |
| *Prionospio depauperata* Imajima, 1990a | 10 (10-11) | 1 (1-2) | 15-16 (16) | upto 10 (8-9) | 5–6 pairs of small teeth above main fang | 45-47 (42) | upto 9 (8) | 1 long MDC and 2 short DLC | Imajima, 1990a; Dagli & Çinar, 2009 |
| *Prionospio dubia*  Day, 1961 | 18 (13-20) | 1(2) | 18 (13-20) | 5 (6-9) | 4 pairs of teeth above main tooth (primary hood inflated, secondary hood reduced) | 49 (42-69) | NA (2) | NA (1 long DMC and 2 short VLL) | Day, 1961; Maciolek, 1985; Imajima, 1990a; Wilson, 1990; Blake *et al*., 1996; Dagli & Çinar 2009 |
| *Prionospio fallax* Söderström, 1920 | NA (10) | NA (1-2) | 12-13 (11 to 14) | NA | 3 to 4 pairs of small teeth above main tooth, secondary hood present | 40 (22-24 or 40-43) | NA | long MDC and two  short, darkly pigmented LL | Söderström, 1920; Sigvaldadóttir & Mackie, 1993; Dagli & Çinar, 2009; Delgado-Blas et al., 2018 |
| *Prionospio henriki* Hylleberg & Nateewathana, 1991 | 10 | NA | 12 to 15 | 9 to 11 | NA | 27 to 36 | 3 to 4 | 1 long MC and 2 rounded LL | Hylleberg & Nateewathana, 1991 |
| *Prionospio jonatani* Delgado-Blas, 2015 | 18 (14–18) | 1 to 2 | 21(16–28) | upto 8 | 4 pairs of small teeth above main tooth with a large main hood and without secondary hoods | 35–57 | upto 4 | 1 long MC and 2 short LL | Delgado-Blas, 2015 |
| *Prionospio jubata*  Blake, 1996 | 10 to 11 | 1 | 13-16 | 7 to 8 | 4 to 6 pairs of apical teeth above main fang, small secondary hood | 45-50 | 1 to 2 | 1 long DMC and 2 shorter tapered LL; dark reddish pigmentation on pygidium and AC | Blake *et al*., 1996 |
| *Prionospio komaeti* Hylleberg & Nateewathana, 1991 | 10 | NA | 12 to 18 | 5 to 10 | NA | 32-44 | 1 to 5 | 1 long MAC and 2 LF | Hylleberg & Nateewathana, 1991 |
| *Prionospio kulin*  Wilson, 1990 | 10 | NA (1) | 19 (11-21) | NA (11-21) | 4-5 pairs of apical teeth above main fang (2-6 pairs) | 32 (21-51) | NA (6) | NA (1 long MDC and 1 pair of short VC) | Wilson, 1990; Radhashevsky, 2015 |
| *Prionospio lineata* Imajima, 1990 | 10 | 1 to 3 | 12 (13) | upto 15 | 6 pairs of small teeth above main fang, secondary hood small | 44 | upto 3 | 1 short DMC and 2 shorter VLC | Imajima, 1990a; Dagli & Çinar, 2009 |
| *Prionospio lylei* Radashevsky, 2015 | 10 | 1 or 2 | 11 to 12 | 9 | 4–5 pairs of thin upper teeth arranged in 2 vertical rows above main fang, with inner and outer hoods | 22–38 | 5 | 1 long MDC and 1 pair of short VC | Radashevsky, 2015 |
| *Prionospio malayensis* (Caullery, 1914) | 10 | NA | 13 (12-15) | 8 to 10 | pointed main fang and a double row of 6 teeth and a single apical tooth | 40 (42-52) | 1 to 3 | 1 long MC and 2 LF | Caullery, 1914; Gallardo, 1968; Hylleberg & Nateewathana, 1991 |
| *Prionospio marsupiala* Blake, 1996 | 10 | 1 to 2 | 16 | 6 to 7 anterior,12-13 in middle, 5-6 in posterior segments | blunt-tipped main fang surmounted by 5-6 pairs of small teeth, apical hood extending between main fang and shaft teeth, primary hood long, inflated, secondary | 47-48 | 4 to 5 | NA | Blake *et al*., 1996 |
| *Prionospio membranacea*  Imajima, 1990 | 10 | 1 | 15 (13-16) | upto 7 | 5-6 pairs of small teeth above main fang, secondary hood small | 49 (49-51) | upto 4 | 1 long DMC and 2 shorter VLC | Imajima, 1990a |
| *Prionospio multicristata* Hutchings & Rainer, 1979 | NA (10) | NA (1 to 2) | 17 (14-18) | 10 to 12 | 5 to 6 pairs of teeth vertically aligned above main fang (4-6 pairs) | 40 (27-44) | 6 (5) | 1 long DMC and 2 short VC | Hutchings & Rainer, 1979;Wilson 1990; Radashevsky, 2015 |
| *Prionospio neenae* Hylleberg & Nateewathana, 1991 | 10 | NA | 14 to 15 | 5 to 9 | NA | 39 or posterior | 1 to 3 | NA | Hylleberg & Nateewathana, 1991 |
| *Prionospio nielseni* Hylleberg & Nateewathana, 1991 | 10 or 11 | NA | 15 to 17 | 8 to 11 | NA | 32-39 | 5 to 6 | 1 long MC and 2 LF | Hylleberg & Nateewathana, 1991 |
| *Prionospio nirripa* Wilson, 1990 | 10 | NA | 17 (14-17) | NA | 5-6 pairs of teeth above main fang | 22-26 (35-36) | NA | 1 long MC and a pair of lateral lappets | Wilson, 1990 |
| *Prionospio oligopinnulata*  Delgado-Blas, 2015 | 10 | 1 | 12 (12–14) | 7 | 4 pairs of small teeth above main tooth and conspicuous secondary hood | 30 (23–39) | 4 | 1 long MC and 2 short LL | Delgado-Blas, 2015 |
| *Prionospio orensanzi* Blake, 1983 | 10 | 1 to 2 | 20 | NA | 10 to 12 apical teeth arranged in 2 rows above main fang; internal hood inconspicuous | 36 | NA | 1 long MC and 2 short lateral cirri | Blake, 1983 |
| *Prionospio oshimensis* Imajima, 1990 | 16 (15) | 1 | 17 | upto 7 | 4 pairs of teeth above main tooth, secondary hood small | NA | NA | NA | Imajima, 1990b |
| *Prionospio pacifica* Zhou & Li, 2009 | 10 to 12 | 1 to 3 | 12 to 17 | 8 to 12 | 4 to 6 pairs of apical teeth above main fang, small secondary hood | 40 to 54 | 4 to 7 | 1 long DMC, 2 shorter tapered VLL | Zhou & Li, 2009 |
| *Prionospio paradisea* Imajima 1990 | 12 (10-12) | 1 or 2 | 17 (13-18) | upto 16 | 4-5 pairs of small teeth above main fang, secondary hood small | 44 (35-54) | upto 8 | 1 long DMC, 2 shorter VLC | Imajima 1990a |
| *Prionospio parapari* Delgado-Blas *et al*., 2018 | 10 to 12 | upto 2 | 11 to 15 | upto 8 | 4 pairs of small teeth above main tooth, and large secondary hoods | 29 to 33 or 38 | upto 6 | 1 long MC and 2 short LL | Delgado-Blas *et al*., 2018 |
| *Prionospio phuketensis* Hylleberg & Nateewathana, 1991 | 10 | NA | 9 to 11 | 4 to 5 | NA | 33 | 9 to 11 | 1 long DMC and 2 shorter VLL | Hylleberg & Nateewathana, 1991 |
| *Prionospio queenslandica* Blake & Kudenov, 1978 | 10 | 1 | 14 | 7 to 8 | 10-12 apical teeth arranged in 2 rows above main fang | 35 to 40 | NA | 1 long MC and 2 lateral bulges | Blake & Kudenov, 1978 |
| *Prionospio rotalis* Mohammad, 1970 | 12 | NA | 17 | 8 to 12 | NA | 40 | 4 to 6 | 1 MDC and 2 latero-ventral lobes | Mohammad, 1970 |
| *Prionospio rotunda* Delgado-Blas, 2015 | 10 | upto 2 | 11 to 12 | 6 | 4 pairs of teeth above the main tooth, with large secondary hoods | 28–32 | 4 | 1 long MC and 2 longer LL | Delgado-Blas, 2015 |
| *Prionospio rugosa* Sigvaldadóttir, 1997 | 10 | 1 to 3 | 14 to 15 | NA | 6 to 8 pairs of small teeth over main fang with conspicuously striated secondary hood | 37 to 41 | NA | 1 long slender MDC and 2 short LL | Sigvaldadóttir, 1997 |
| *Prionospio runei* Hylleberg & Nateewathana, 1991 | 10 (10 and 13) | NA | 8 to 12 | 2 to 4 | NA | NA | NA | NA | Hylleberg & Nateewathana, 1991 |
| *Prionospio sishaensis* Wu & Chen, 1964 | NA | NA | 10 to 49 | NA | 1 larger and 4 smaller teeth surrounded by a hood | NA | NA | NA | Wu & Chen, 1964 |
| *Prionospio steenstrupi* Malmgren, 1867 | 10 (9-12) | 1-2 (1-3) | 15-17 (12-21) | NA (8-17) | 4-6 pairs of small teeth above main fang; small secondary hood | 43-58 (31-72) | NA (4-7 pairs of teeth) | 1 long DMC and 2 short LL | Malmgren, 1867; Maciolek, 1985; Sigvaldadóttir & Mackie, 1993; Blake *et al*., 1996; Dagli & Çinar, 2009 |
| *Prionospio variegata* Imajima, 1990 | 10 | 1 or 2 | 11 | upto 6 | 5 pairs of small teeth above main fang; secondary hood small | 25 | upto 3 | 1 long DMC and 2 shorter VLC | Imajima, 1990a |

Description of paratypes and other specimens in parenthesis

MDC-mid dorsal cirrus, VC-ventral cirrus, VLL-ventrolateral lobes, LL-lateral lobes, LF- Lateral folds, AC-anal cirrus, DLC-dorsolateral cirri, MC-median cirrus, VLC-ventrolateral cirri, NA-not available
